# Supplementary material
Source: PubMed Central journal article supplement (PMC2685937)

**A**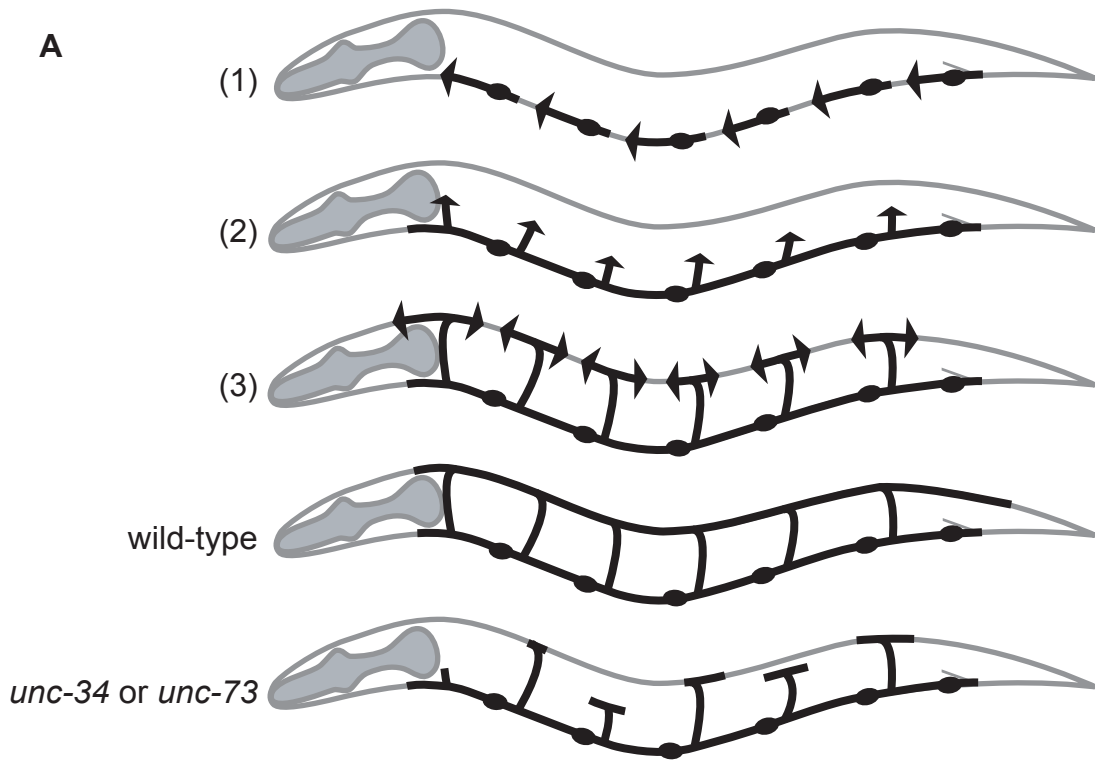**B**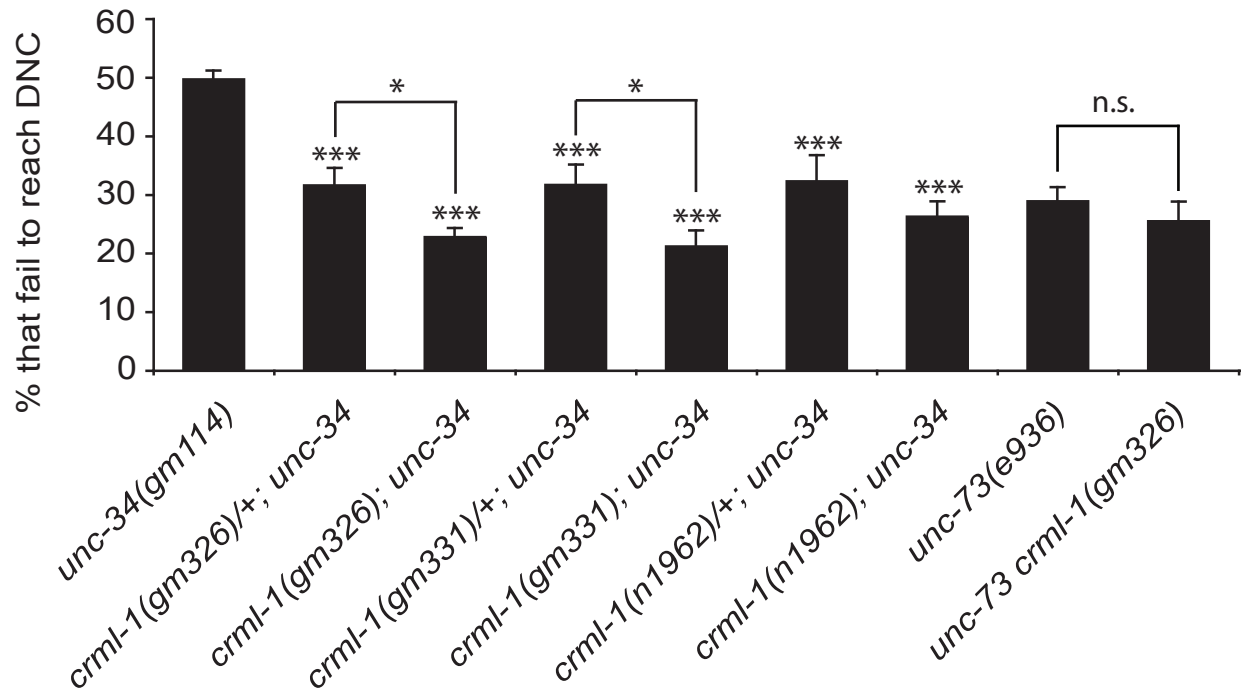

Supplement: supp_136_7_1201__3.pdf [file supp_136_7_1201__3.pdf]
